# Supplementary material for: Tunable dual-emission luminescence from Cu(i)-cluster-based MOFs for multi-stimuli responsive materials
Source: Royal Society of Chemistry journal article supplement (doi:10.1039/d0tc05311b), 2021-01-01
Supplement: d0tc05311b1.pdf [file d0tc05311b1.pdf]

## Electronic Supporting Information

### **Tunable dual-emission luminescence from Cu (I)-cluster-based MOFs for multi-stimuli responsive materials**

Yunfang Zhao,<sup>ab</sup> Muxin Yu,<sup>ac</sup> Caiping Liu,<sup>a</sup> Shengchang Li,<sup>a</sup> Zhijia Li,<sup>a</sup> Feilong Jiang,<sup>a</sup> Lian Chen<sup>\*a</sup> and Maochun Hong<sup>\*a</sup>

<sup>a</sup> Fujian Institute of Research on the Structure of Matter, Chinese Academy of Sciences (CAS), Fuzhou, Fujian 350002, China.

<sup>b</sup> Fujian Normal University, Fuzhou, Fujian, 350007, China.

<sup>c</sup> Organic Optoelectronics Engineering Research Center of Fujian's Universities, Fujian Jiangxia University, Fuzhou, Fujian, 350108, China.

## Content

### Supplementary Figures

|                                                                                                                                                                                                                                                                 |    |
|-----------------------------------------------------------------------------------------------------------------------------------------------------------------------------------------------------------------------------------------------------------------|----|
| <b>Figure S1.</b> Asymmetric unit of <b>1</b> .....                                                                                                                                                                                                             | 3  |
| <b>Figure S2.</b> Asymmetric unit of <b>2</b> .....                                                                                                                                                                                                             | 3  |
| <b>Figure S3.</b> PXRD patterns of the compounds .....                                                                                                                                                                                                          | 3  |
| <b>Figure S4.</b> PXRD patterns of <b>1</b> and <b>2</b> after immersed in different pH of aqueous solutions.....                                                                                                                                               | 4  |
| <b>Figure S5.</b> TG curves of compounds <b>1</b> and <b>2</b> .....                                                                                                                                                                                            | 4  |
| <b>Figure S6.</b> Temperature-dependent PXRD patterns.....                                                                                                                                                                                                      | 4  |
| <b>Figure S7.</b> Lifetimes of <b>1</b> excited at 379 nm at 77 K and 298 K.....                                                                                                                                                                                | 5  |
| <b>Figure S8.</b> Lifetimes of <b>2</b> excited at 370 nm at 77 K and 298 K.....                                                                                                                                                                                | 6  |
| <b>Figure S9.</b> The TG curves of <b>2</b> and <b>2</b> -activated.....                                                                                                                                                                                        | 6  |
| <b>Figure S10.</b> The experimental PXRD pattern for activated samples and simulated pattern.....                                                                                                                                                               | 7  |
| <b>Figure S11.</b> The emission spectra of <b>2</b> and <b>2</b> -activated normalized by LE-band intensity.....                                                                                                                                                | 7  |
| <b>Figure S12.</b> DOS analyses of two compounds.....                                                                                                                                                                                                           | 7  |
| <b>Figure S13.</b> PXRD patterns of <b>1</b> and <b>2</b> after immersed in different solvents.....                                                                                                                                                             | 8  |
| <b>Figure S14.</b> The IR spectra of <b>1</b> and <b>1</b> -CH <sub>3</sub> CN.....                                                                                                                                                                             | 8  |
| <b>Figure S15.</b> The IR spectra of <b>2</b> and <b>2</b> -CH <sub>3</sub> CN.....                                                                                                                                                                             | 8  |
| <b>Figure S16.</b> The IR spectra of <b>2</b> and <b>2</b> -CH <sub>2</sub> Cl <sub>2</sub> .....                                                                                                                                                               | 9  |
| <b>Figure S17.</b> The IR spectra of <b>2</b> and <b>2</b> -CHCl <sub>3</sub> .....                                                                                                                                                                             | 9  |
| <b>Figure S18.</b> The IR spectra of <b>2</b> and <b>2</b> -CH <sub>3</sub> OH.....                                                                                                                                                                             | 9  |
| <b>Figure S19.</b> The IR spectra of <b>2</b> and <b>2</b> -CH <sub>3</sub> CH <sub>2</sub> OH.....                                                                                                                                                             | 10 |
| <b>Figure S20.</b> The IR spectra of <b>2</b> and <b>2</b> -CH <sub>3</sub> COCH <sub>3</sub> .....                                                                                                                                                             | 10 |
| <b>Figure S21.</b> The linear curves between the area of two emission bands and 1/T of two compounds:<br><b>1</b> (left) and <b>2</b> (right).....                                                                                                              | 10 |
| <b>Figure S22.</b> (a) PL spectra of compound <b>1</b> in 4-NA. (b) The intensity of emission band of 610 nm<br>with 4-NA adding. (c) Nonlinear relationship between $I_0$ and $I$ . (d) Linear relationship between $I_0$<br>and $I$ at low concentration..... | 11 |
| <b>Figure S23.</b> PL spectra and linearly fitted curves of compound <b>1</b> in 2, 6-DNT, 2-NA, 3-NA.....                                                                                                                                                      | 12 |
| <b>Figure S24.</b> PL spectra and linearly fitted curves of compound <b>1</b> in 4-NP and MNP.....                                                                                                                                                              | 13 |
| <b>Figure S25.</b> Different nitro-compounds and PXRD patterns of <b>1</b> after immersed.....                                                                                                                                                                  | 13 |
| <b>Figure S26.</b> Spectral overlaps of the emission spectra of <b>1</b> with the UV-vis spectra of different nitro-<br>compounds.....                                                                                                                          | 13 |
| <b>Supplementary Scheme</b>                                                                                                                                                                                                                                     |    |
| <b>Scheme. S1</b> Illustration of NTQ induced by the energy transfer from X/MLCT and <sup>3</sup> CC states....                                                                                                                                                 | 14 |
| <b>Supplementary Tables</b>                                                                                                                                                                                                                                     |    |
| <b>Table S1.</b> Crystal data collection and structure refinement parameters.....                                                                                                                                                                               | 14 |
| <b>Table S2.</b> Lifetimes of compounds.....                                                                                                                                                                                                                    | 16 |
| <b>Table S3.</b> HOMO and LUMO energies of <b>1</b> and nitro-compounds calculated by Gaussian.....                                                                                                                                                             | 16 |
| <b>Table S4.</b> Primary bond lengths of <b>1</b> at 100 K, 200 K, 298 K.....                                                                                                                                                                                   | 17 |
| <b>Table S5.</b> Primary bond lengths of <b>2</b> at 100 K, 200 K, 298 K.....                                                                                                                                                                                   | 17 |
| <b>Table S6.</b> Bond angles of <b>1</b> at 100 K, 200 K, 298 K.....                                                                                                                                                                                            | 18 |
| <b>Table S7.</b> Bond angles of <b>2</b> at 100 K, 200 K, 298 K.....                                                                                                                                                                                            | 19 |

Supplementary Figures

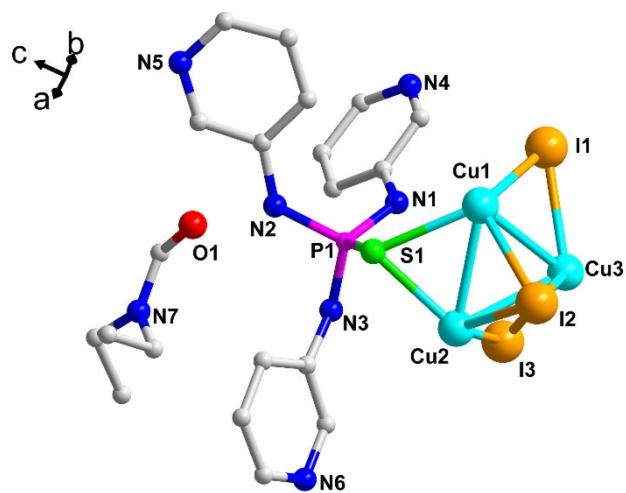

Figure S1. Asymmetric unit of 1.

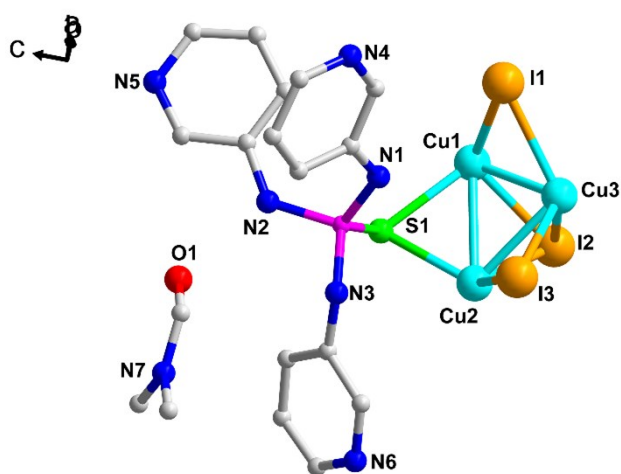

Figure S2. Asymmetric unit of 2.

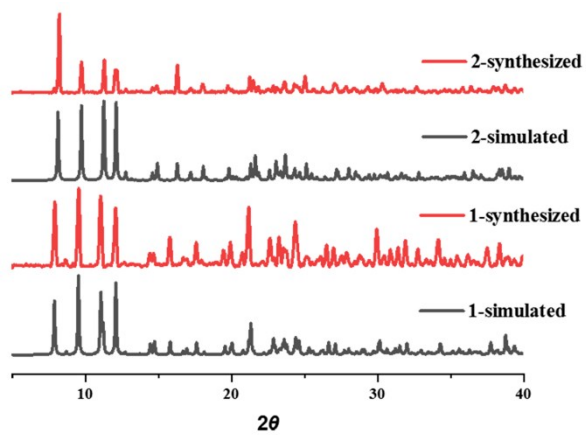

Figure S3. PXRD patterns of the compounds.

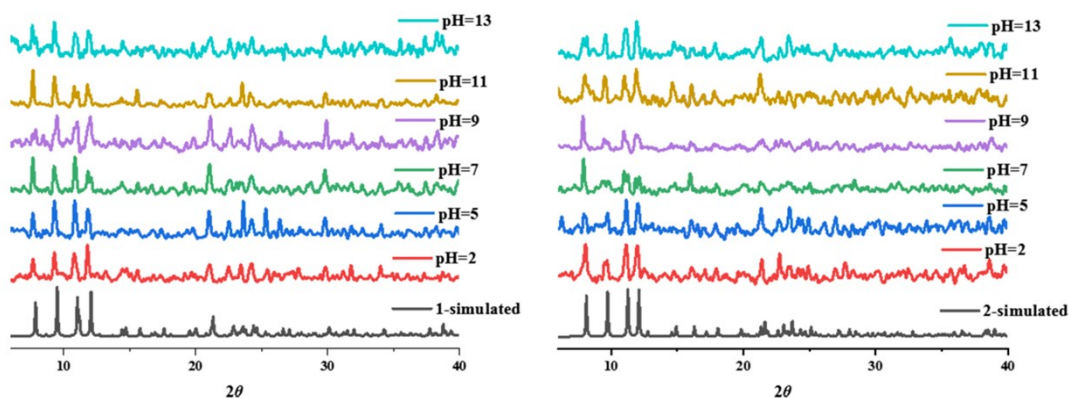

Figure S4. PXRD patterns of **1** (left) and **2** (right) after immersed in different pH of aqueous solutions.

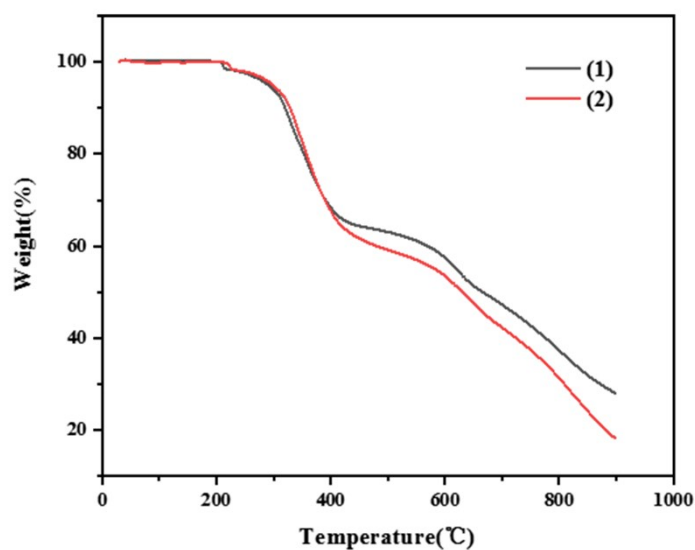

Figure S5. TG curves of compounds **1** and **2**.

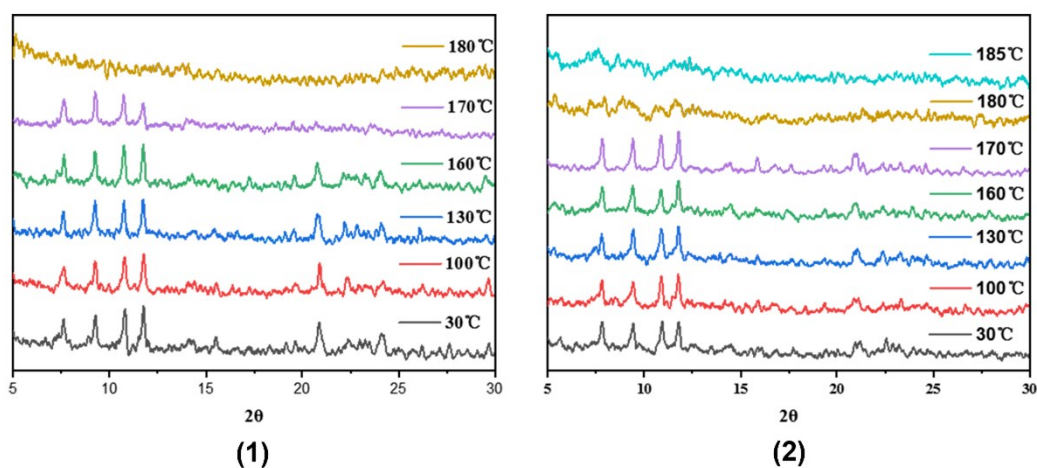

Figure S6. Temperature-dependent PXRD patterns of **1** (left) and **2** (right).

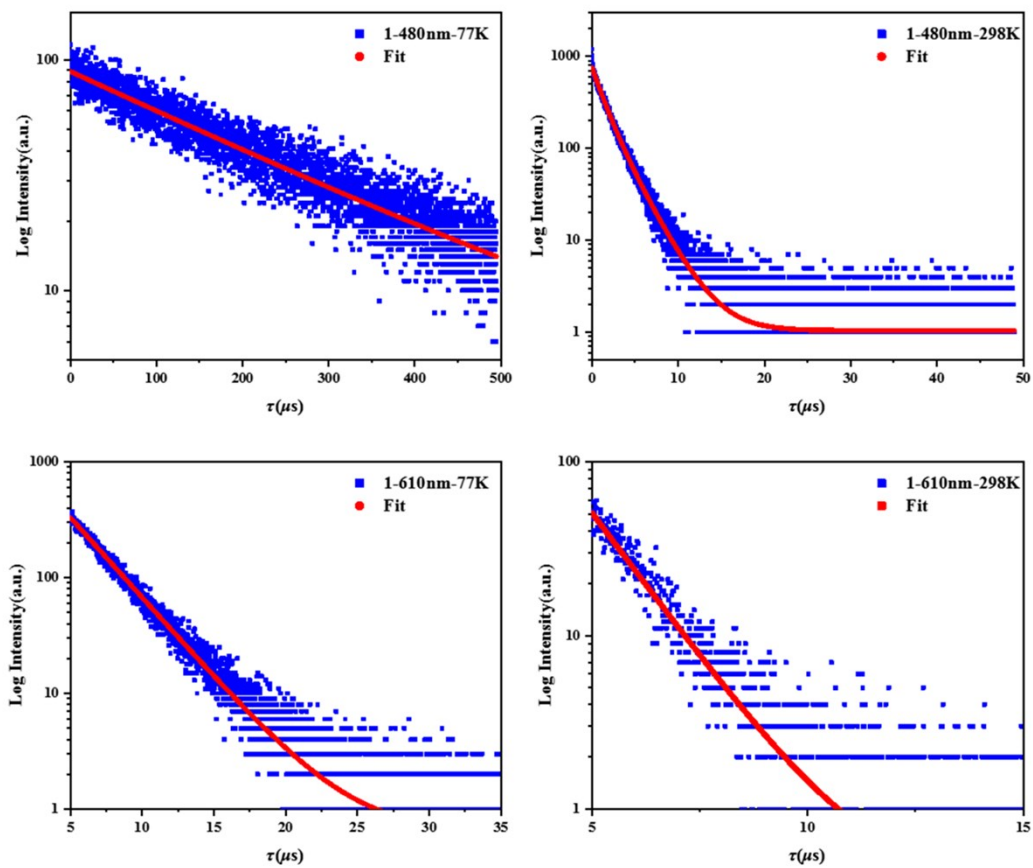

**Figure S7.** Lifetimes of **1** excited at 379 nm at 77 K and 298 K.

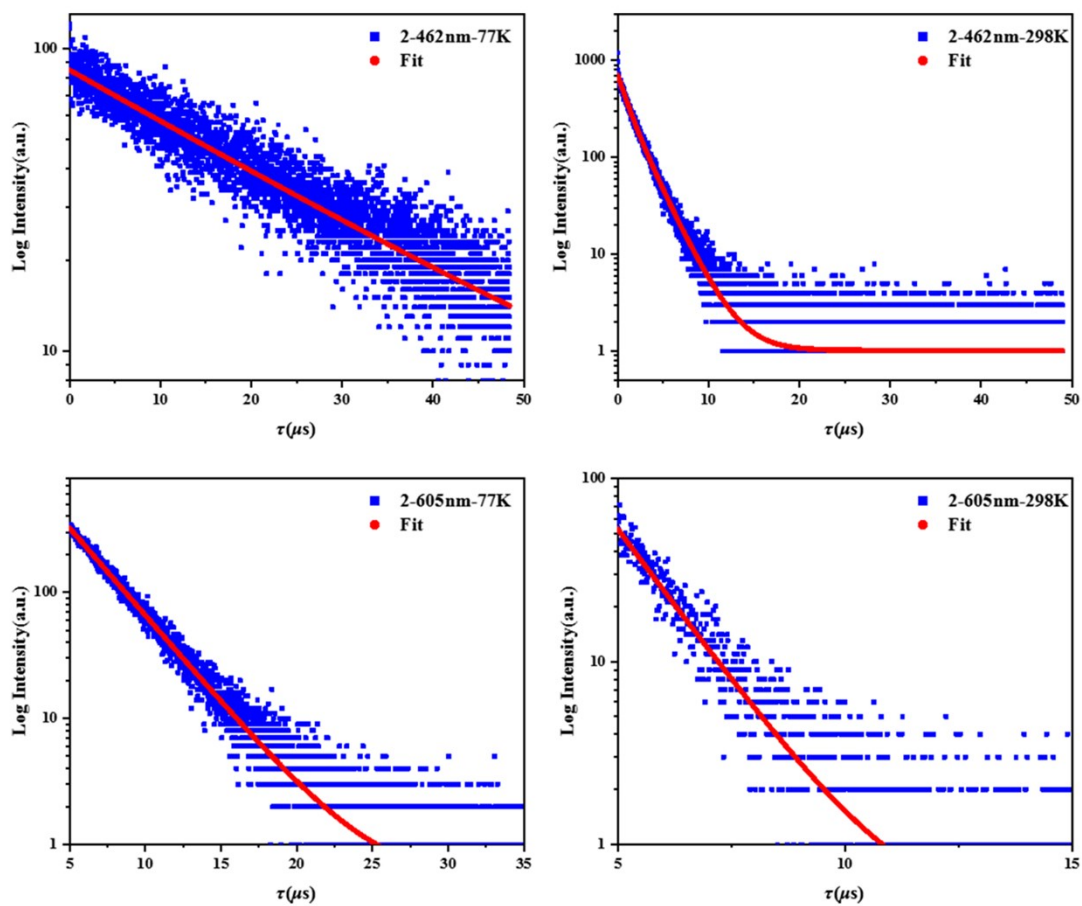

**Figure S8.** Lifetimes of **2** excited at 370 nm at 77 K and 298 K.

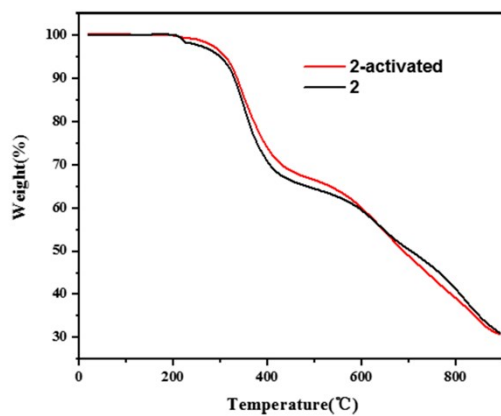

**Figure S9.** The TG curves of **2** and **2-activated** after activation.

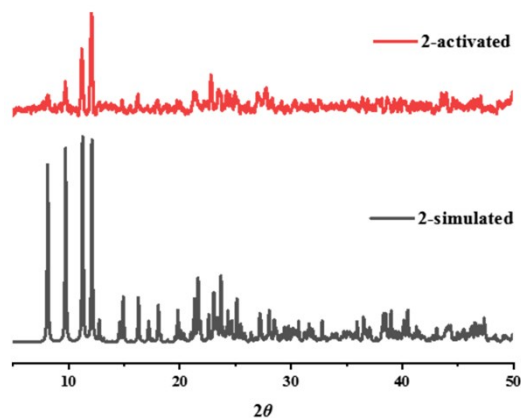

**Figure S10.** The experimental PXRD pattern for activated samples and simulated pattern.

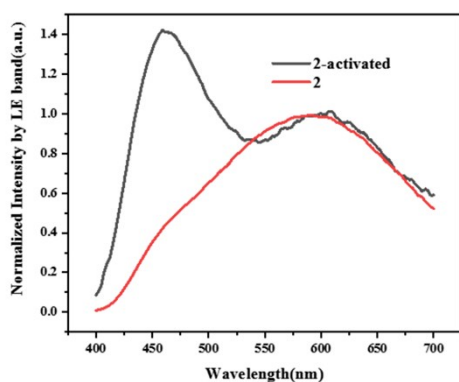

**Figure S11.** The emission spectra of **2** and **2-activated** normalized by LE-band intensity.

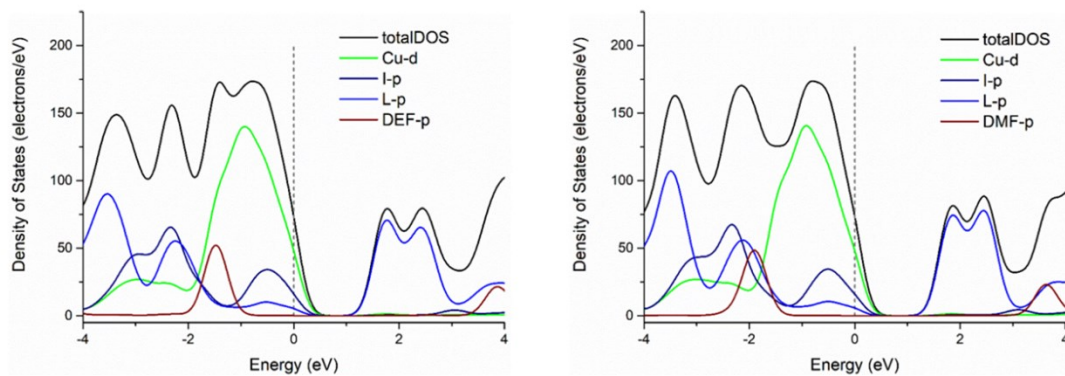

**Figure S12.** DOS analyses of the two compounds.

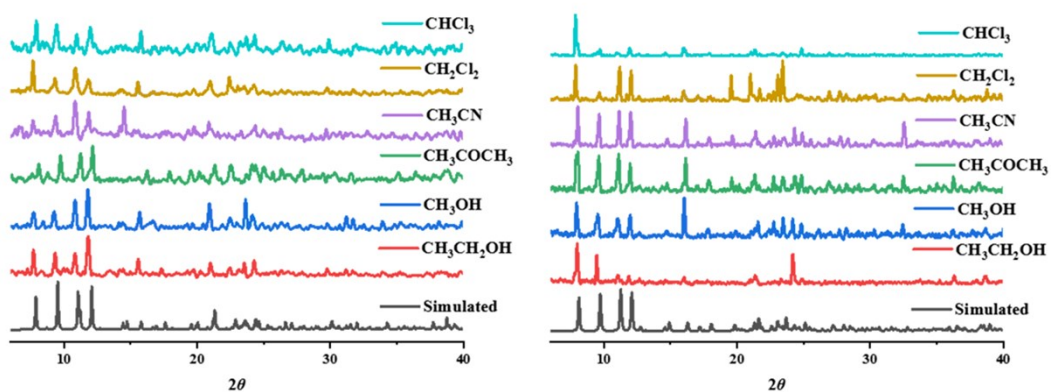

**Figure S13.** PXRD patterns of **1** (left) and **2** (right) after immersed in different solvents.

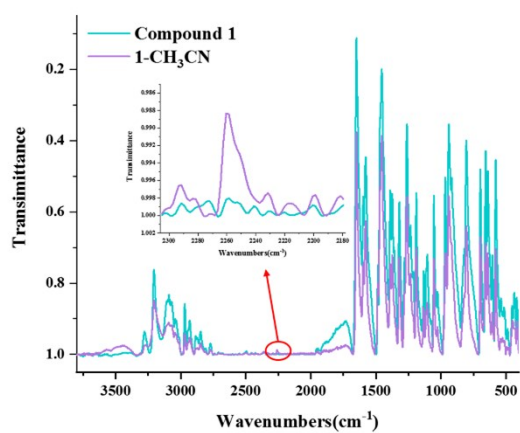

**Figure S14.** The IR spectra of **1** and **1-CH<sub>3</sub>CN**.

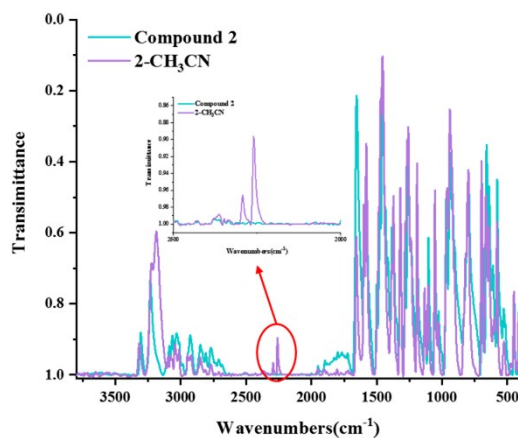

**Figure S15.** The IR spectra of **2** and **2-CH<sub>3</sub>CN**.



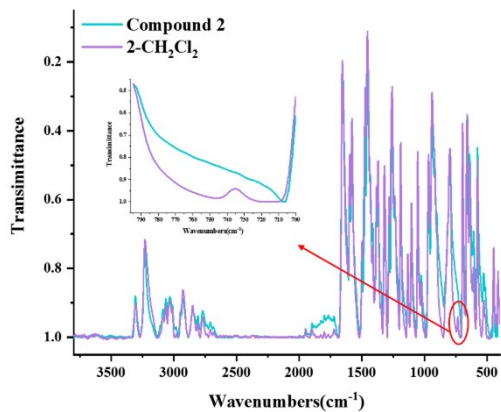

Figure S16. The IR spectra of **2** and 2-CH<sub>2</sub>Cl<sub>2</sub>.

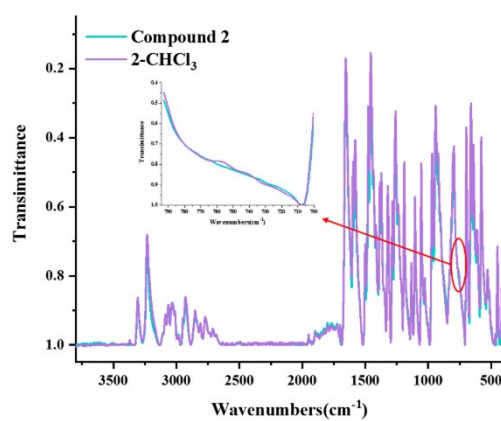

Figure S17. The IR spectra of **2** and 2-CHCl<sub>3</sub>.

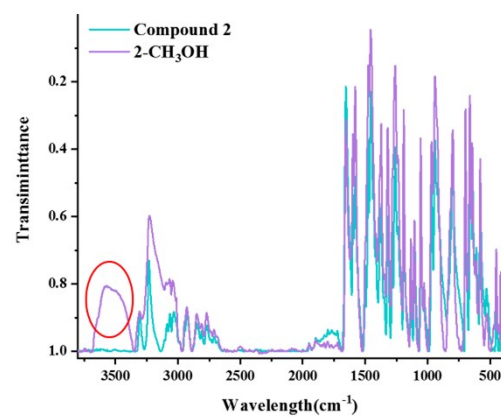

Figure S18. The IR spectra of **2** and 2-CH<sub>3</sub>OH.

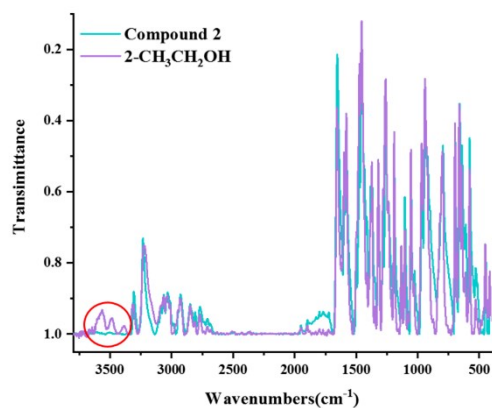

Figure S19. The IR spectra of **2** and 2-CH<sub>3</sub>CH<sub>2</sub>OH.

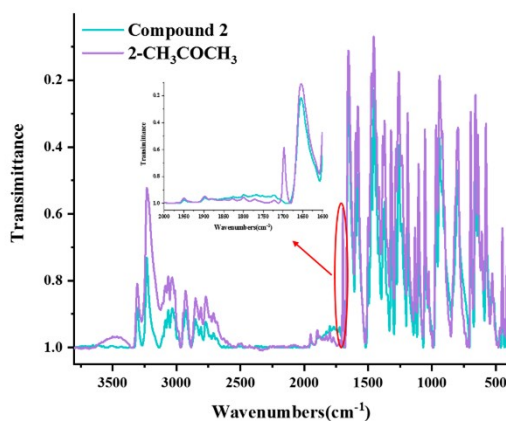

Figure S20. The IR spectra of **2** and 2-CH<sub>3</sub>COCH<sub>3</sub>.

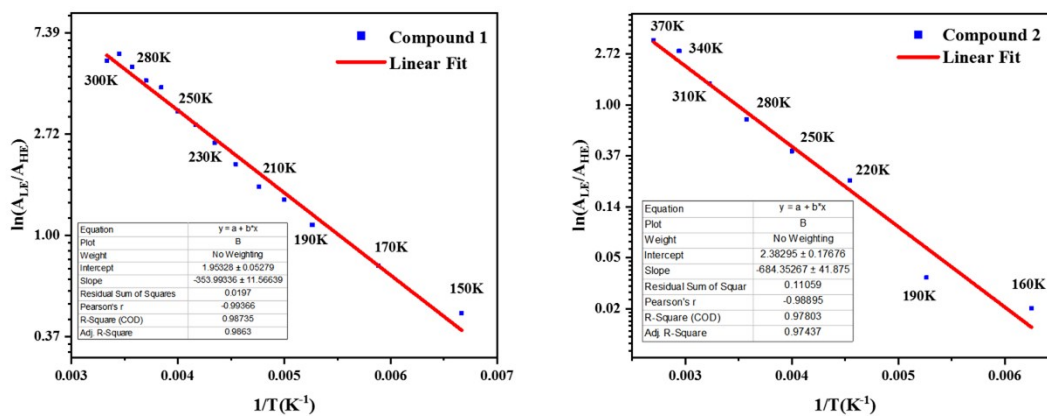

Figure S21. The linear curves between the area of two emission bands and 1/T of two compounds: **1** (left) and **2** (right).

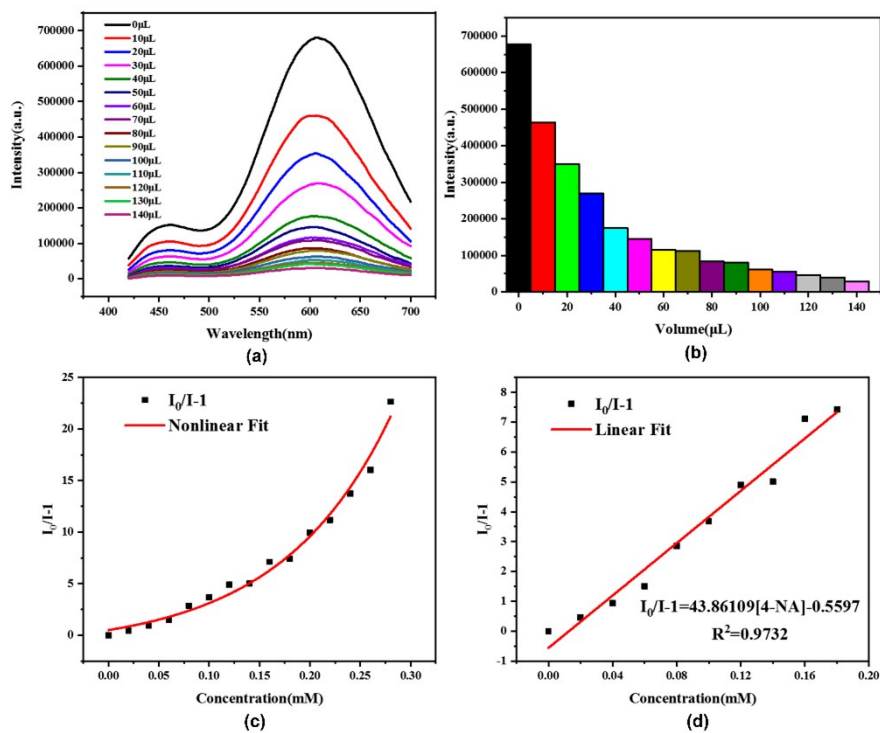

**Figure S22.** (a) PL spectra of Compound 1 in 4-NA. (b) The intensity of emission band at 610 nm with 4-NA adding. (c) Nonlinear relationship between  $I_0$  and  $I$ . (d) Linear relationship between  $I_0$  and  $I$  at low concentration.

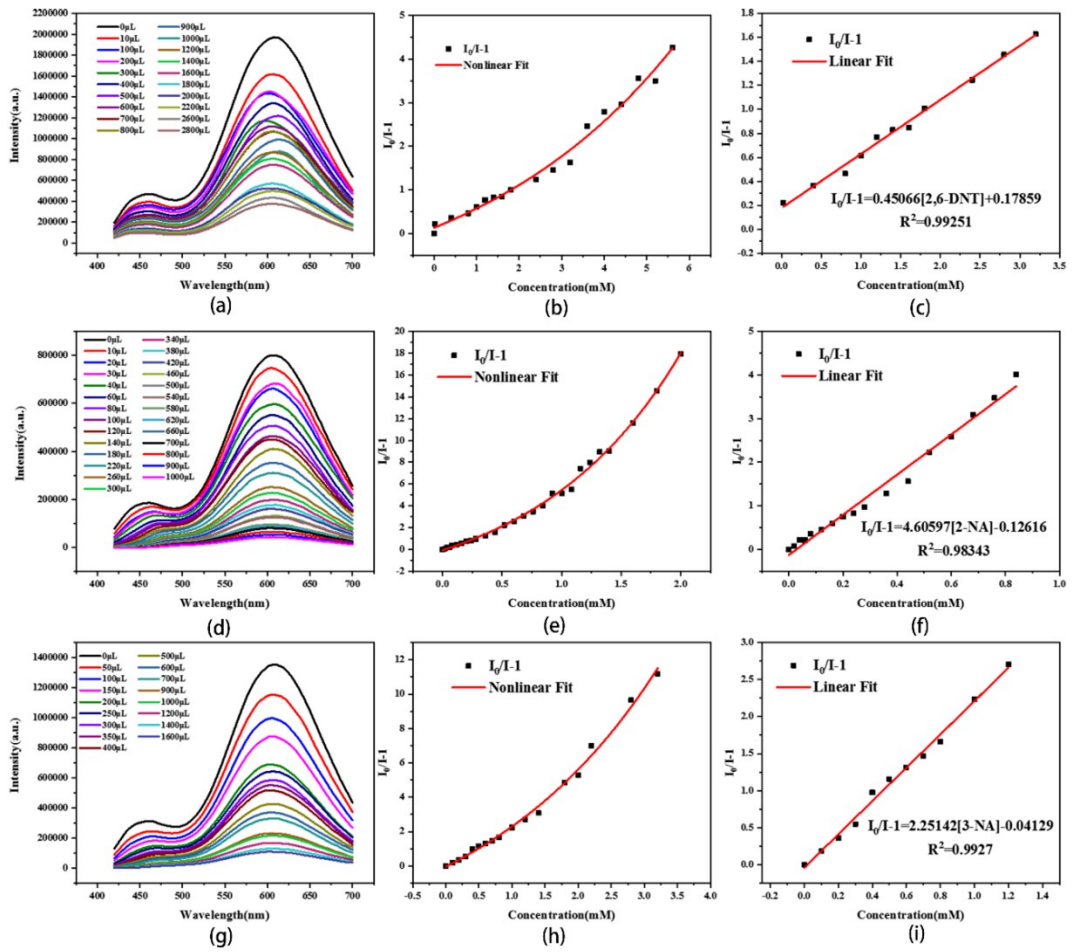

**Figure S23.** PL spectra and linearly fitted curves of compound **1** in 2, 6-DNT, 2-NA, 3-NA.

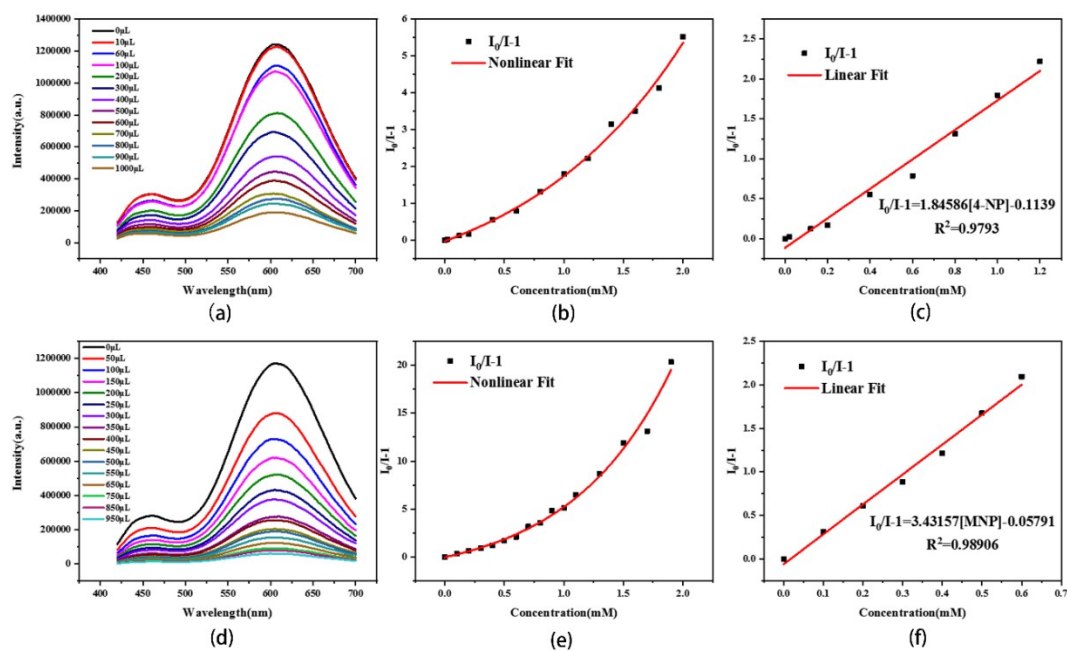

**Figure S24.** PL spectra and linearly fitted curves of compound **1** in 4-NP and MNP.

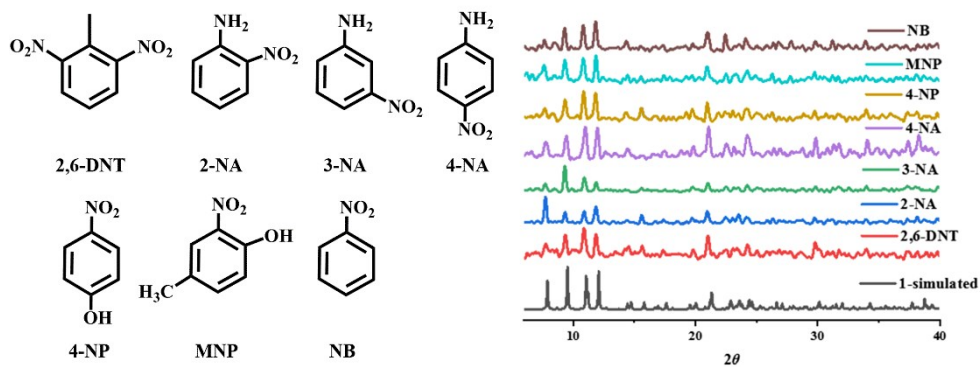

**Figure S25.** Different nitro-compounds and PXRD patterns of **1** after immersed

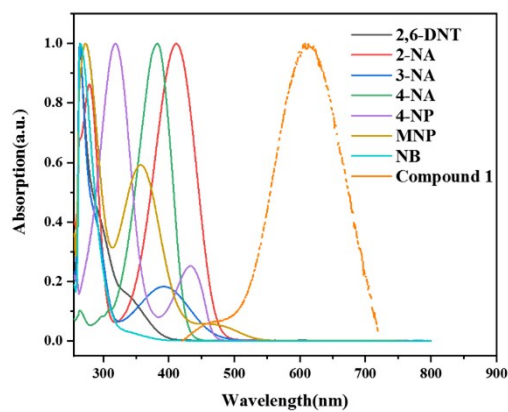

**Figure S26.** Spectral overlaps of the emission spectra of **1** with the UV-vis spectra of different nitro-compounds.

## Supplementary Scheme

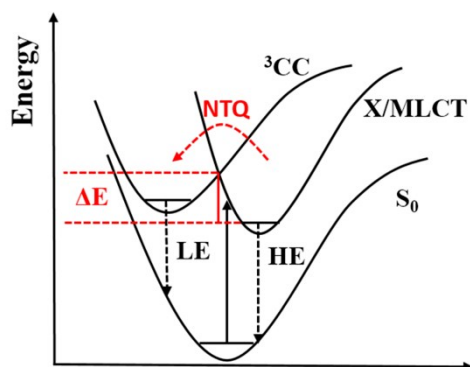

**Scheme. S1** Illustration of NTQ induced by the energy transfer from X/MLCT and  $^3\text{CC}$  states.

## Supplementary Tables

**Table S1.** Crystal data collection and structure refinement parameters.

| Compound 1                   | 1(100 K)                                                              | 1(200 K)                                                              | 1(298 K)                                                              |
|------------------------------|-----------------------------------------------------------------------|-----------------------------------------------------------------------|-----------------------------------------------------------------------|
| <b>Empirical formula</b>     | $\text{C}_{20}\text{H}_{26}\text{Cu}_3\text{I}_3\text{N}_7\text{OPS}$ | $\text{C}_{20}\text{H}_{26}\text{Cu}_3\text{I}_3\text{N}_7\text{OPS}$ | $\text{C}_{20}\text{H}_{26}\text{Cu}_3\text{I}_3\text{N}_7\text{OPS}$ |
| <b>Formula weight</b>        | 1014.83                                                               | 1014.83                                                               | 1014.83                                                               |
| <b>Crystal system</b>        | orthorhombic                                                          | orthorhombic                                                          | orthorhombic                                                          |
| <b>Space group</b>           | <i>Pbca</i>                                                           | <i>Pbca</i>                                                           | <i>Pbca</i>                                                           |
| <b><i>a</i>/Å</b>            | 16.53192                                                              | 16.5787(3)                                                            | 16.6113(3)                                                            |
| <b><i>b</i>/Å</b>            | 15.77722                                                              | 15.88552                                                              | 15.9932(4)                                                            |
| <b><i>c</i>/Å</b>            | 22.4311(3)                                                            | 22.4738(4)                                                            | 22.5054(5)                                                            |
| <b><math>\alpha</math>/°</b> | 90                                                                    | 90                                                                    | 90                                                                    |
| <b><math>\beta</math>/°</b>  | 90                                                                    | 90                                                                    | 90                                                                    |
| <b><math>\gamma</math>/°</b> | 90                                                                    | 90                                                                    | 90                                                                    |

|                                                         |                                                                                   |                                                                                   |                                                                                   |
|---------------------------------------------------------|-----------------------------------------------------------------------------------|-----------------------------------------------------------------------------------|-----------------------------------------------------------------------------------|
| <b>Volume/Å<sup>3</sup></b>                             | 5850.64(13)                                                                       | 5918.72(17)                                                                       | 5979.02                                                                           |
| <b>Z</b>                                                | 8                                                                                 | 8                                                                                 | 8                                                                                 |
| <b><math>\rho_{\text{calc}}</math> g/cm<sup>3</sup></b> | 2.304                                                                             | 2.278                                                                             | 2.255                                                                             |
| <b><math>\mu</math>/mm<sup>-1</sup></b>                 | 28.809                                                                            | 28.478                                                                            | 28.191                                                                            |
| <b>F(000)</b>                                           | 3840.0                                                                            | 3840.0                                                                            | 3840.0                                                                            |
| <b>GOOF</b>                                             | 1.043                                                                             | 1.020                                                                             | 1.038                                                                             |
| <b><math>R_{\text{int}}</math></b>                      | 0.0534                                                                            | 0.0336                                                                            | 0.0341                                                                            |
| <b><math>R_1</math></b>                                 | 0.0405                                                                            | 0.0333                                                                            | 0.0318                                                                            |
| <b><math>\omega R_2</math></b>                          | 0.0946                                                                            | 0.0710                                                                            | 0.0760                                                                            |
| <b>Compound 2</b>                                       | <b>2(100K)</b>                                                                    | <b>2(200K)</b>                                                                    | <b>2(298K)</b>                                                                    |
| <b>Empirical formula</b>                                | C <sub>18</sub> H <sub>22</sub> Cu <sub>3</sub> I <sub>3</sub> N <sub>7</sub> OPS | C <sub>18</sub> H <sub>22</sub> Cu <sub>3</sub> I <sub>3</sub> N <sub>7</sub> OPS | C <sub>18</sub> H <sub>22</sub> Cu <sub>3</sub> I <sub>3</sub> N <sub>7</sub> OPS |
| <b>Formula weight</b>                                   | 986.77                                                                            | 986.77                                                                            | 986.77                                                                            |
| <b>Crystal system</b>                                   | orthorhombic                                                                      | orthorhombic                                                                      | orthorhombic                                                                      |
| <b>Space group</b>                                      | <i>Pbca</i>                                                                       | <i>Pbca</i>                                                                       | <i>Pbca</i>                                                                       |
| <b><math>a</math>/Å</b>                                 | 16.55536(19)                                                                      | 16.5966(3)                                                                        | 16.6231(4)                                                                        |
| <b><math>b</math>/Å</b>                                 | 15.68341(18)                                                                      | 15.7587(3)                                                                        | 15.8506(4)                                                                        |
| <b><math>c</math>/Å</b>                                 | 21.7743(3)                                                                        | 21.8393(4)                                                                        | 21.9202(5)                                                                        |
| <b><math>\alpha</math>/°</b>                            | 90                                                                                | 90                                                                                | 90                                                                                |
| <b><math>\beta</math>/°</b>                             | 90                                                                                | 90                                                                                | 90                                                                                |
| <b><math>\gamma</math>/°</b>                            | 90                                                                                | 90                                                                                | 90                                                                                |
| <b>Volume/Å<sup>3</sup></b>                             | 5653.58(11)                                                                       | 5711.87(18)                                                                       | 5775.72                                                                           |

|                                                |        |        |        |
|------------------------------------------------|--------|--------|--------|
| <b>Z</b>                                       | 8      | 8      | 8      |
| <b><math>\rho_{calc} \text{ g/cm}^3</math></b> | 2.319  | 2.295  | 2.270  |
| <b><math>\mu/\text{mm}^{-1}</math></b>         | 29.788 | 29.48  | 29.16  |
| <b>F(000)</b>                                  | 3712.0 | 3712.0 | 3712.0 |
| <b>GOOF</b>                                    | 1.051  | 1.0230 | 1.0280 |
| <b><math>R_{int}</math></b>                    | 0.0348 | 0.0441 | 0.0331 |
| <b><math>R_1</math></b>                        | 0.0248 | 0.0274 | 0.0262 |
| <b><math>\omega R_2</math></b>                 | 0.0561 | 0.0660 | 0.0599 |

**Table S2.** Lifetimes of compounds.

| Compound | Emission band | Total-lifetime-298 K ( $\mu\text{s}$ ) | Lifetime- ( $\mu\text{s}$ ) | %      |
|----------|---------------|----------------------------------------|-----------------------------|--------|
| 1        | 480nm         | 0.20                                   | 0.13                        | 43.27% |
|          |               |                                        | 0.26                        | 56.73% |
|          | 610nm         | 12.98                                  | 12.98                       | 100%   |
| 2        | 462nm         | 0.19                                   | 0.11                        | 29.37% |
|          |               |                                        | 0.23                        | 70.63% |
|          | 605nm         | 13.00                                  | 13.00                       | 100%   |
| Compound | Emission band | Total-lifetime-77 K ( $\mu\text{s}$ )  | Lifetime- ( $\mu\text{s}$ ) | %      |
| 1        | 480nm         | 24.54                                  | 24.54                       | 100%   |
|          | 610nm         | 31.31                                  | 31.31                       | 100%   |
| 2        | 462nm         | 24.95                                  | 24.95                       | 100%   |
|          | 605nm         | 31.28                                  | 31.28                       | 100%   |

**Table S3.** HOMO and LUMO energies of **1** and nitro-compounds calculated by Gaussian.

|     |      | HOMO (eV) | LUMO (eV) | Band Gap (eV) |
|-----|------|-----------|-----------|---------------|
| MOF | 1    | +1.5793   | -0.0001   | 1.5794        |
|     | 2-NA | -6.4117   | -2.8372   | 3.5745        |
|     | 3-NA | -6.2374   | -2.9002   | 3.3372        |



|                 |         |         |         |        |
|-----------------|---------|---------|---------|--------|
| <b>Analytes</b> | 4-NA    | -6.4644 | -2.5719 | 3.8925 |
|                 | NB      | -7.5912 | -2.4283 | 5.1629 |
|                 | 2,6-DNT | -7.011  | -2.125  | 4.886  |
|                 | 4-NP    | -7.3519 | -2.9904 | 4.3615 |
|                 | MNP     | -6.9872 | -3.3656 | 3.6216 |

| <b>Bond</b>                                                                                              | <b>100 K (Å)</b> | <b>200 K (Å)</b> | <b>298 K (Å)</b> |
|----------------------------------------------------------------------------------------------------------|------------------|------------------|------------------|
| I2-Cu2                                                                                                   | 2.6816(8)        | 2.6902(7)        | 2.6975(9)        |
| I2-Cu3                                                                                                   | 2.7603(9)        | 2.7650(7)        | 2.7681(10)       |
| I2-Cu1                                                                                                   | 2.6503(8)        | 2.6517(7)        | 2.6524(9)        |
| I1-Cu3                                                                                                   | 2.6748(9)        | 2.6817(8)        | 2.6902(10)       |
| I1-Cu1                                                                                                   | 2.5777(9)        | 2.5789(7)        | 2.5790(9)        |
| I3-Cu2                                                                                                   | 2.6397(8)        | 2.6474(7)        | 2.6514(9)        |
| I3-Cu3                                                                                                   | 2.6874(9)        | 2.6902(8)        | 2.6923(10)       |
| Cu2 -Cu3                                                                                                 | 2.6446(11)       | 2.6668(9)        | 2.6899(12)       |
| Cu2 -Cu1                                                                                                 | 2.7516(11)       | 2.7800(9)        | 2.8100(12)       |
| Cu2-S1                                                                                                   | 2.3946(14)       | 2.3937(11)       | 2.3997(14)       |
| Cu2-N4 <sup>1</sup>                                                                                      | 2.059(4)         | 2.053(3)         | 2.061(4)         |
| Cu1-Cu3                                                                                                  | 2.6769(11)       | 2.6977(9)        | 2.7246(12)       |
| Cu3-N5 <sup>3</sup>                                                                                      | 2.062(4)         | 2.060(4)         | 2.071(4)         |
| Cu1-S1                                                                                                   | 2.5054(15)       | 2.5099(12)       | 2.5228(16)       |
| Cu1-N6 <sup>2</sup>                                                                                      | 2.046(4)         | 2.052(4)         | 2.050(4)         |
| Symmetry codes: <sup>1</sup> 1/2+X,+Y,1/2-Z; <sup>2</sup> 3/2-X,-1/2+Y,+Z; <sup>3</sup> +X,1/2-Y,-1/2+Z. |                  |                  |                  |

**Table S4.** Primary bond lengths of **1** at 100 K, 200 K, 298 K.

**Table S5.** Primary bond lengths of **2** at 100 K, 200 K, 298 K.

| <b>Bond</b>         | <b>100 K(Å)</b> | <b>200 K(Å)</b> | <b>298 K(Å)</b> |
|---------------------|-----------------|-----------------|-----------------|
| I3-Cu2              | 2.6221(5)       | 2.6283(7)       | 2.6324(7)       |
| I3-Cu3              | 2.6729(5)       | 2.6758(7)       | 2.6783(8)       |
| I2-Cu1              | 2.6376(5)       | 2.6411(8)       | 2.6450(8)       |
| I2-Cu2              | 2.6867(5)       | 2.6948(7)       | 2.7008(7)       |
| I2-Cu3              | 2.7835(5)       | 2.7890(8)       | 2.7912(8)       |
| I1-Cu1              | 2.5818(5)       | 2.5827(8)       | 2.5797(7)       |
| I1-Cu3              | 2.6879(5)       | 2.6944(8)       | 2.7033(8)       |
| Cu1-Cu2             | 2.7713(7)       | 2.8037(10)      | 2.8438(10)      |
| Cu1-Cu3             | 2.5982(7)       | 2.6191(9)       | 2.6442(10)      |
| Cu1-S1              | 2.4894(9)       | 2.5063(12)      | 2.5249(13)      |
| Cu1-N6 <sup>1</sup> | 2.040(3)        | 2.048(3)        | 2.048(3)        |
| Cu2-Cu3             | 2.6657(7)       | 2.6828(10)      | 2.6961(10)      |

|                                                                                                          |           |            |            |
|----------------------------------------------------------------------------------------------------------|-----------|------------|------------|
| Cu2-S1                                                                                                   | 2.3401(8) | 2.3449(11) | 2.3545(12) |
| Cu2-N4 <sup>2</sup>                                                                                      | 2.049(3)  | 2.054(4)   | 2.054(3)   |
| Cu3-N5 <sup>3</sup>                                                                                      | 2.045(3)  | 2.049(4)   | 2.052(3)   |
| Symmetry codes: <sup>1</sup> 1/2-X,1/2+Y,+Z; <sup>2</sup> -1/2+X,+Y,1/2-Z; <sup>3</sup> +X,3/2-Y,-1/2+Z. |           |            |            |

**Table S6.** Bond angles of **1** at 100 K, 200 K, 298 K.

| Atom 1 | Atom 2 | Atom 3 | Angle-100 K(°) | Angle-200 K(°) | Angle-298 K(°) |
|--------|--------|--------|----------------|----------------|----------------|
| Cu2    | I3     | Cu3    | 59.52(3)       | 59.94(2)       | 60.44(3)       |
| Cu2    | I2     | Cu3    | 58.13(2)       | 58.512(19)     | 58.95(3)       |
| Cu1    | I2     | Cu2    | 62.13(3)       | 62.72(2)       | 63.36(3)       |
| Cu1    | I2     | Cu3    | 59.27(2)       | 59.70(2)       | 60.30(3)       |
| Cu1    | I1     | Cu3    | 61.25(3)       | 61.67(2)       | 62.23(3)       |
| I3     | Cu2    | I2     | 118.85(3)      | 118.46(3)      | 118.03(3)      |
| I3     | Cu2    | Cu1    | 107.72(3)      | 107.36(2)      | 107.17(3)      |
| I3     | Cu2    | Cu3    | 61.14(3)       | 60.82(2)       | 60.53(3)       |
| I2     | Cu2    | Cu1    | 58.38(2)       | 57.96(2)       | 57.54(3)       |
| Cu3    | Cu2    | I2     | 62.42(3)       | 62.15(2)       | 61.84(3)       |
| Cu3    | Cu2    | Cu1    | 59.44(3)       | 59.33(2)       | 59.34(3)       |
| S1     | Cu2    | I3     | 116.86(4)      | 116.48(3)      | 116.14(4)      |
| S1     | Cu2    | I2     | 103.53(4)      | 103.25(3)      | 103.14(4)      |
| S1     | Cu2    | Cu1    | 57.77(4)       | 57.46(3)       | 57.28(4)       |
| S1     | Cu2    | Cu3    | 111.09(4)      | 110.55(3)      | 110.19(5)      |
| I2     | Cu1    | Cu2    | 59.49(2)       | 59.32(2)       | 59.10(3)       |
| I2     | Cu1    | Cu3    | 62.41(3)       | 62.24(2)       | 61.95(3)       |
| I1     | Cu1    | I2     | 116.15(3)      | 116.10(3)      | 115.96(3)      |
| I1     | Cu1    | Cu2    | 109.37(3)      | 109.05(3)      | 108.60(3)      |
| I1     | Cu1    | Cu3    | 61.17(3)       | 61.04(2)       | 60.89(3)       |
| Cu3    | Cu1    | Cu2    | 58.29(3)       | 58.24(2)       | 58.13(3)       |
| S1     | Cu1    | I2     | 101.42(4)      | 101.22(3)      | 101.10(4)      |
| S1     | Cu1    | I1     | 121.12(4)      | 120.44(3)      | 119.60(4)      |
| S1     | Cu1    | Cu2    | 53.95(3)       | 53.51(3)       | 53.15(4)       |
| S1     | Cu1    | Cu3    | 106.65(4)      | 106.06(3)      | 105.45(5)      |
| I3     | Cu3    | I2     | 114.49(3)      | 114.43(3)      | 114.24(3)      |
| I3     | Cu3    | Cu1    | 108.54(3)      | 108.54(3)      | 108.49(4)      |
| I1     | Cu3    | I3     | 110.81(3)      | 110.56(2)      | 110.34(3)      |
| I1     | Cu3    | I2     | 109.44(3)      | 109.14(2)      | 108.71(3)      |
| I1     | Cu3    | Cu1    | 57.59(2)       | 57.29(2)       | 56.88(3)       |
| Cu2    | Cu3    | I3     | 59.34(3)       | 59.23(2)       | 59.03(3)       |
| Cu2    | Cu3    | I2     | 59.44(2)       | 59.34(2)       | 59.22(3)       |
| Cu2    | Cu3    | I1     | 109.71(3)      | 109.42(3)      | 108.95(3)      |
| Cu2    | Cu3    | Cu1    | 62.27(3)       | 62.42(2)       | 62.53(3)       |
| Cu1    | Cu3    | I2     | 58.32(2)       | 58.06(2)       | 57.75(3)       |

|                                                                                                                                                                                                  |    |     |           |           |           |
|--------------------------------------------------------------------------------------------------------------------------------------------------------------------------------------------------|----|-----|-----------|-----------|-----------|
| Cu2                                                                                                                                                                                              | S1 | Cu1 | 68.28(4)  | 69.03(3)  | 69.57(4)  |
| P1                                                                                                                                                                                               | S1 | Cu2 | 100.17(6) | 100.39(5) | 100.54(6) |
| P1                                                                                                                                                                                               | S1 | Cu1 | 115.43(7) | 116.32(5) | 117.11(6) |
| Symmetry codes: <sup>1</sup> 1/2+X,+Y,1/2-Z; <sup>2</sup> 3/2-X,-1/2+Y,+Z; <sup>3</sup> +X,1/2-Y,-1/2+Z; <sup>4</sup> 3/2-X,1/2+Y,+Z; <sup>5</sup> -1/2+X,+Y,1/2-Z; <sup>6</sup> +X,1/2-Y,1/2+Z. |    |     |           |           |           |

**Table S7.** Bond angles of **2** at 100 K, 200 K, 298 K.

| Atom1 | Atom2 | Atom3 | Angle-100 K(°) | Angle-200 K(°) | Angle-298 K(°) |
|-------|-------|-------|----------------|----------------|----------------|
| Cu2   | I3    | Cu3   | 60.445(15)     | 60.76(2)       | 61.01(2)       |
| Cu1   | I2    | Cu2   | 62.722(15)     | 63.39(2)       | 64.27(2)       |
| Cu1   | I2    | Cu3   | 57.201(14)     | 57.60(2)       | 58.14(2)       |
| Cu2   | I2    | Cu3   | 58.295(14)     | 58.55(2)       | 58.77(2)       |
| Cu1   | I1    | Cu3   | 59.042(15)     | 59.47(2)       | 60.01(2)       |
| I2    | Cu1   | Cu2   | 59.505(14)     | 59.24(2)       | 58.82(2)       |
| I1    | Cu1   | I2    | 120.848(19)    | 120.66(3)      | 120.33(3)      |
| I1    | Cu1   | Cu2   | 109.661(19)    | 109.35(3)      | 108.99(3)      |
| I1    | Cu1   | Cu3   | 62.514(16)     | 62.39(2)       | 62.31(2)       |
| Cu3   | Cu1   | I2    | 64.225(16)     | 64.04(2)       | 63.70(2)       |
| Cu3   | Cu1   | Cu2   | 59.426(17)     | 59.19(3)       | 58.71(3)       |
| S1    | Cu1   | I2    | 101.37(2)      | 100.85(4)      | 100.01(3)      |
| S1    | Cu1   | I1    | 115.28(2)      | 115.13(4)      | 115.38(4)      |
| S1    | Cu1   | Cu2   | 52.49(2)       | 52.05(3)       | 51.61(3)       |
| S1    | Cu1   | Cu3   | 104.87(3)      | 104.21(4)      | 103.52(4)      |
| I3    | Cu2   | I2    | 116.455(18)    | 116.40(3)      | 116.56(3)      |
| I3    | Cu2   | Cu1   | 108.350(18)    | 107.94(3)      | 107.46(3)      |
| I3    | Cu2   | Cu3   | 60.719(15)     | 60.49(2)       | 60.33(2)       |
| I2    | Cu2   | Cu1   | 57.772(14)     | 57.37(2)       | 56.91(2)       |
| Cu3   | Cu2   | I2    | 62.670(15)     | 62.48(2)       | 62.29(2)       |
| Cu3   | Cu2   | Cu1   | 57.055(17)     | 56.98(2)       | 56.94(2)       |
| S1    | Cu2   | I3    | 117.97(2)      | 117.58(4)      | 117.25(4)      |
| S1    | Cu2   | I2    | 104.03(2)      | 103.68(3)      | 102.97(4)      |
| S1    | Cu2   | Cu1   | 57.55(2)       | 57.43(3)       | 57.19(3)       |
| S1    | Cu2   | Cu3   | 107.18(3)      | 106.95(4)      | 106.83(4)      |
| I3    | Cu3   | I2    | 111.605(17)    | 111.75(3)      | 112.07(3)      |
| I3    | Cu3   | I1    | 113.005(17)    | 112.83(3)      | 112.57(3)      |
| I1    | Cu3   | I2    | 112.118(17)    | 111.73(2)      | 111.15(3)      |
| Cu1   | Cu3   | I3    | 112.15(2)      | 112.17(3)      | 112.16(3)      |
| Cu1   | Cu3   | I2    | 58.574(15)     | 58.37(2)       | 58.16(2)       |
| Cu1   | Cu3   | I1    | 58.443(15)     | 58.14(2)       | 57.67(2)       |
| Cu1   | Cu3   | Cu2   | 63.519(18)     | 63.84(3)       | 64.34(3)       |
| Cu2   | Cu3   | I3    | 58.835(14)     | 58.75(2)       | 58.65(2)       |

|                                                                                                                                                                                                     |     |     |             |           |           |
|-----------------------------------------------------------------------------------------------------------------------------------------------------------------------------------------------------|-----|-----|-------------|-----------|-----------|
| Cu2                                                                                                                                                                                                 | Cu3 | l2  | 59.035(14)  | 58.97(2)  | 58.94(2)  |
| Cu2                                                                                                                                                                                                 | Cu3 | l1  | 109.697(19) | 109.70(3) | 109.81(3) |
| Cu2                                                                                                                                                                                                 | S1  | Cu1 | 69.95(2)    | 70.52(3)  | 71.20(4)  |
| P1                                                                                                                                                                                                  | S1  | Cu1 | 119.49(4)   | 119.69(6) | 119.59(6) |
| P1                                                                                                                                                                                                  | S1  | Cu2 | 101.54(4)   | 101.81(5) | 102.13(5) |
| Symmetry codes: <sup>1</sup> 1/2-X,1/2+Y,+Z; <sup>2</sup> -1/2+X,+Y,1/2-Z; <sup>3</sup> +X,3/2-Y,-1/2+Z; <sup>4</sup> 1/2-X,-1/2+Y,+Z;<br><sup>5</sup> 1/2+X,+Y,1/2-Z; <sup>6</sup> +X,3/2-Y,1/2+Z. |     |     |             |           |           |
